# Supplementary material for: Unravelling the origin of dual photoluminescence in Au2Cu6 clusters by triplet sensitization and photon upconversion
Source: Royal Society of Chemistry journal article supplement (doi:10.1039/d1tc04591a), 2021-12-10
Supplement: d1tc04591a1.pdf [file d1tc04591a1.pdf]

## Supporting Information

### Unravelling the origin of dual photoluminescence in Au<sub>2</sub>Cu<sub>6</sub> clusters by triplet sensitization and photon upconversion

Daichi Arima, Yoshiki Niihori, Masaaki Mitsui\*

*Department of Chemistry, College of Science, Rikkyo University, 3-34-1, Nishiikebukuro, Toshima-ku, Tokyo, 171-8501, Japan.*

Corresponding author

\*E-mail: mitsui@rikkyo.ac.jp

#### Contents

|                                                                                                                                        |                   |
|----------------------------------------------------------------------------------------------------------------------------------------|-------------------|
| <b><u>Fig. S1 and S2</u></b>                                                                                                           | <b><u>S2</u></b>  |
| <b><u>Evaluation of photoluminescence quantum yield by relative method</u></b>                                                         | <b><u>S2</u></b>  |
| <b><u>Photostability of Au<sub>2</sub>Cu<sub>6</sub> in DCM and THF (Fig. S3)</u></b>                                                  | <b><u>S3</u></b>  |
| <b><u>Fig. S4</u></b>                                                                                                                  | <b><u>S4</u></b>  |
| <b><u>Fig. S5</u></b>                                                                                                                  | <b><u>S5</u></b>  |
| <b><u>Triplet energy transfer (TET) efficiency</u></b>                                                                                 | <b><u>S5</u></b>  |
| <b><u>Fig. S6, Table S1</u></b>                                                                                                        | <b><u>S6</u></b>  |
| <b><u>Emitter quenching yield <math>\Phi_q</math> and optical outcoupling yield <math>\Phi_{out}</math> (Fig. S7 and Table S2)</u></b> | <b><u>S7</u></b>  |
| <b><u>Fig. S8 and Table S3</u></b>                                                                                                     | <b><u>S8</u></b>  |
| <b><u>Temperature dependence of photoluminescence (Table S4 and S5)</u></b>                                                            | <b><u>S9</u></b>  |
| <b><u>Theoretical calculations (Figure S9 and S10 and Table S6)</u></b>                                                                | <b><u>S10</u></b> |
| <b><u>References</u></b>                                                                                                               | <b><u>S12</u></b> |

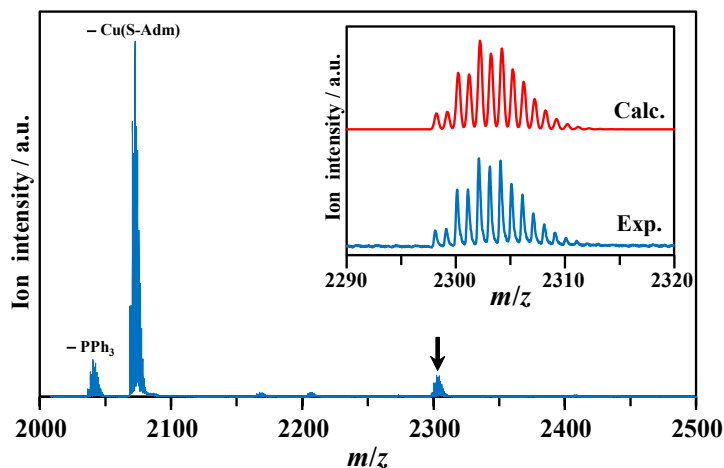

**Fig. S1.** Positive-ion mode ESI-mass spectrum of  $\text{Au}_2\text{Cu}_6(\text{S-Adm})_6(\text{PPh}_3)_2$ . The daughter ions of  $\text{Cu}(\text{S-Adm})$  or  $\text{PPh}_3$  dissociated from the parent ion were also observed.

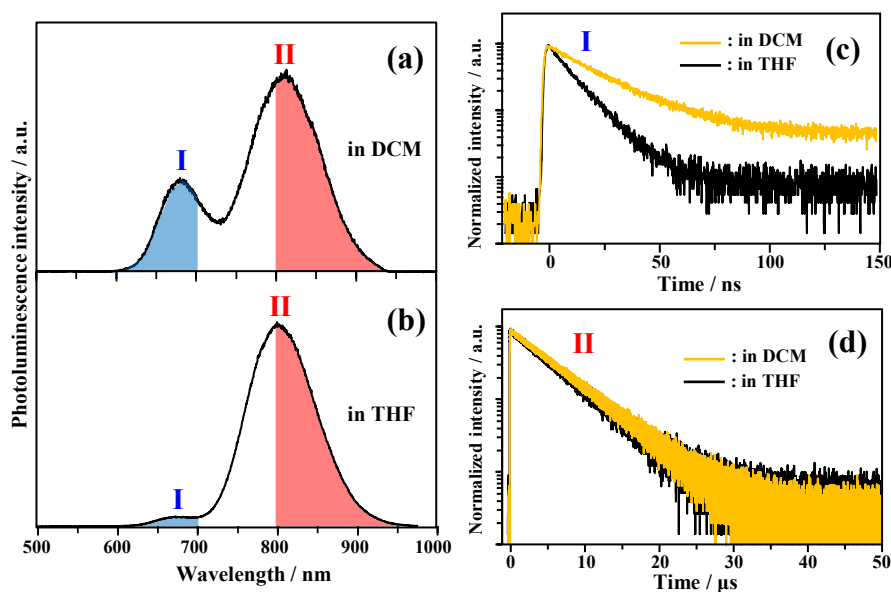

**Fig. S2** PL spectra of  $\text{Au}_2\text{Cu}_6(\text{S-Adm})_6(\text{PPh}_3)_2$  (10  $\mu\text{M}$ ) in a) DCM and b) THF. To perform band-separated PL lifetime measurements, photons with wavelengths in the filled regions, c)  $\lambda \leq 700$  nm of band-I or d)  $\lambda \geq 800$  nm of band-II, were selectively recorded using appropriate filters. As a result, only the fast or slow decay component is observed for band-I or -II, respectively.

### Evaluation of photoluminescence quantum yield by relative method

The relative PL quantum yield ( $\Phi_{\text{PL}}$ ) was calculated using the following equation:

$$\Phi_{PL} = \frac{I_r(1 - 10^{-A_r(\lambda_{ex})}) \int F_s(\lambda_{em}) d\lambda_{em} n_s^2}{I_s(1 - 10^{-A_s(\lambda_{ex})}) \int F_r(\lambda_{em}) d\lambda_{em} n_r^2} \Phi_f^r, \quad (S1)$$

where  $\Phi_f^r$  represents the known fluorescence quantum yield of the reference dye,  $A$ ,  $F$ , and  $I$  represent the absorbance at the excitation wavelength ( $\lambda_{ex}$ ), the PL intensity, and excitation laser intensity, respectively, and  $n$  is the refractive index of the corresponding solvent. PDI ( $\Phi_f = 0.97$  in toluene)<sup>1</sup> was used as a standard for 532 nm excitation.

### Photostability of Au<sub>2</sub>Cu<sub>6</sub> in DCM and THF

The dynamic light scattering apparatus (nanoSAQLA, Otsuka electronics Co., Ltd.) was used to evaluate the average particle size in solution, as depicted in Fig. S3. When the DCM solution of the Au<sub>2</sub>Cu<sub>6</sub>(S-Adm)<sub>6</sub>(PPh<sub>3</sub>)<sub>2</sub> clusters was exposed to room light for 1 hour, the formation of nanoparticles with an average diameter of ca. 40 nm was observed, as shown in the right panel of Fig. S3c. The results suggest that light irradiation induces dissociation of the organic ligands from the clusters, leading to the aggregation of the metal atoms.

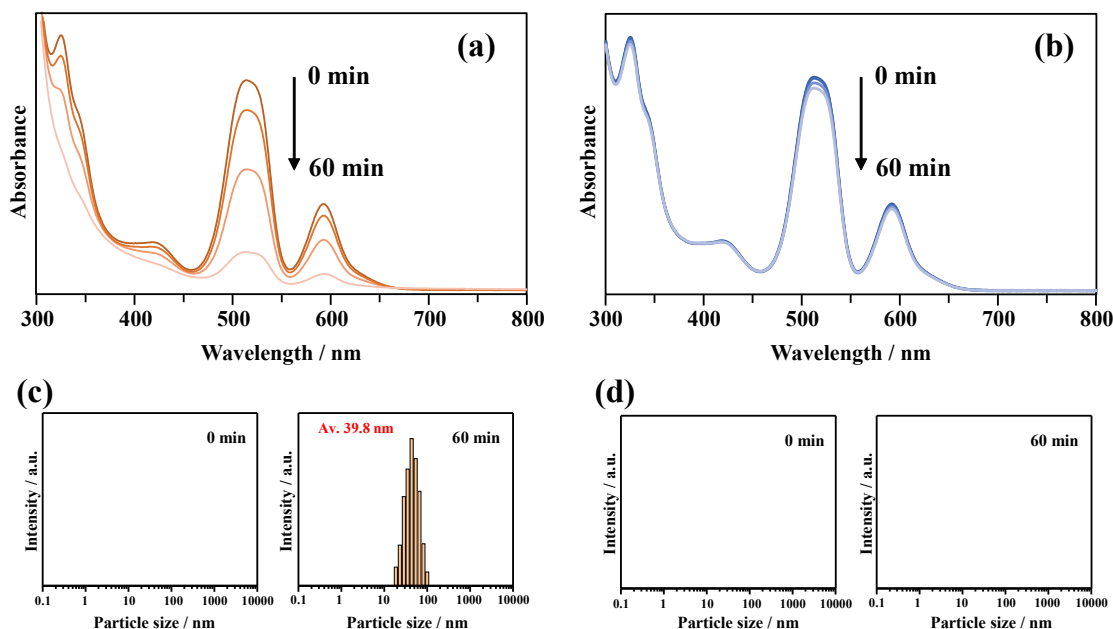

**Fig. S3** Time evolution of absorption spectra and particle size distribution, obtained using dynamic light scattering measurements, of Au<sub>2</sub>Cu<sub>6</sub>(S-Adm)<sub>6</sub>(PPh<sub>3</sub>)<sub>2</sub> in aerated (a,c) DCM and (b,d) THF solutions under room light.

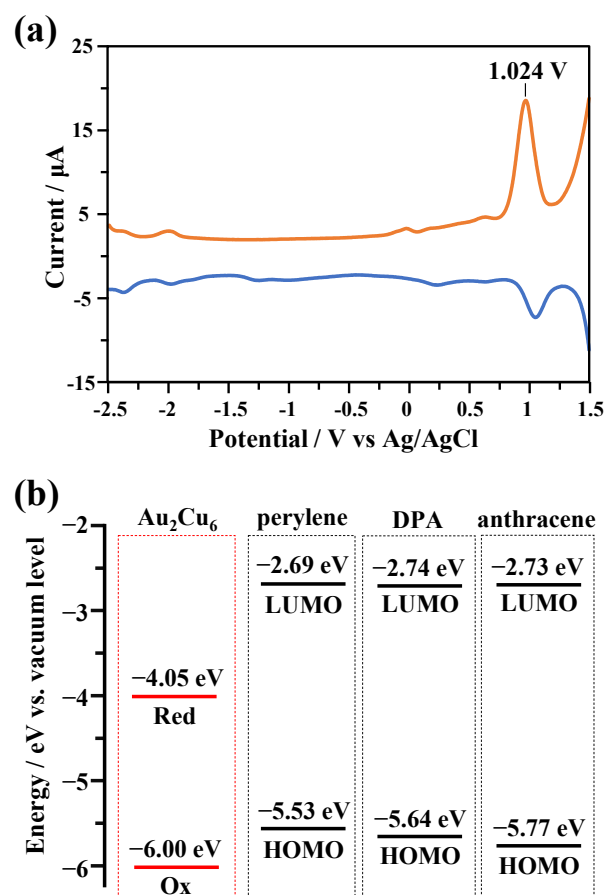

**Fig. S4** a) Differential pulse voltammetry signals of  $\text{Au}_2\text{Cu}_6(\text{S-Adm})_6(\text{PPh}_3)_2$  (10  $\mu\text{M}$ ) in acetonitrile and b) redox potentials of  $\text{Au}_2\text{Cu}_6(\text{S-Adm})_6(\text{PPh}_3)_2$ , perylene, DPA, and anthracene.

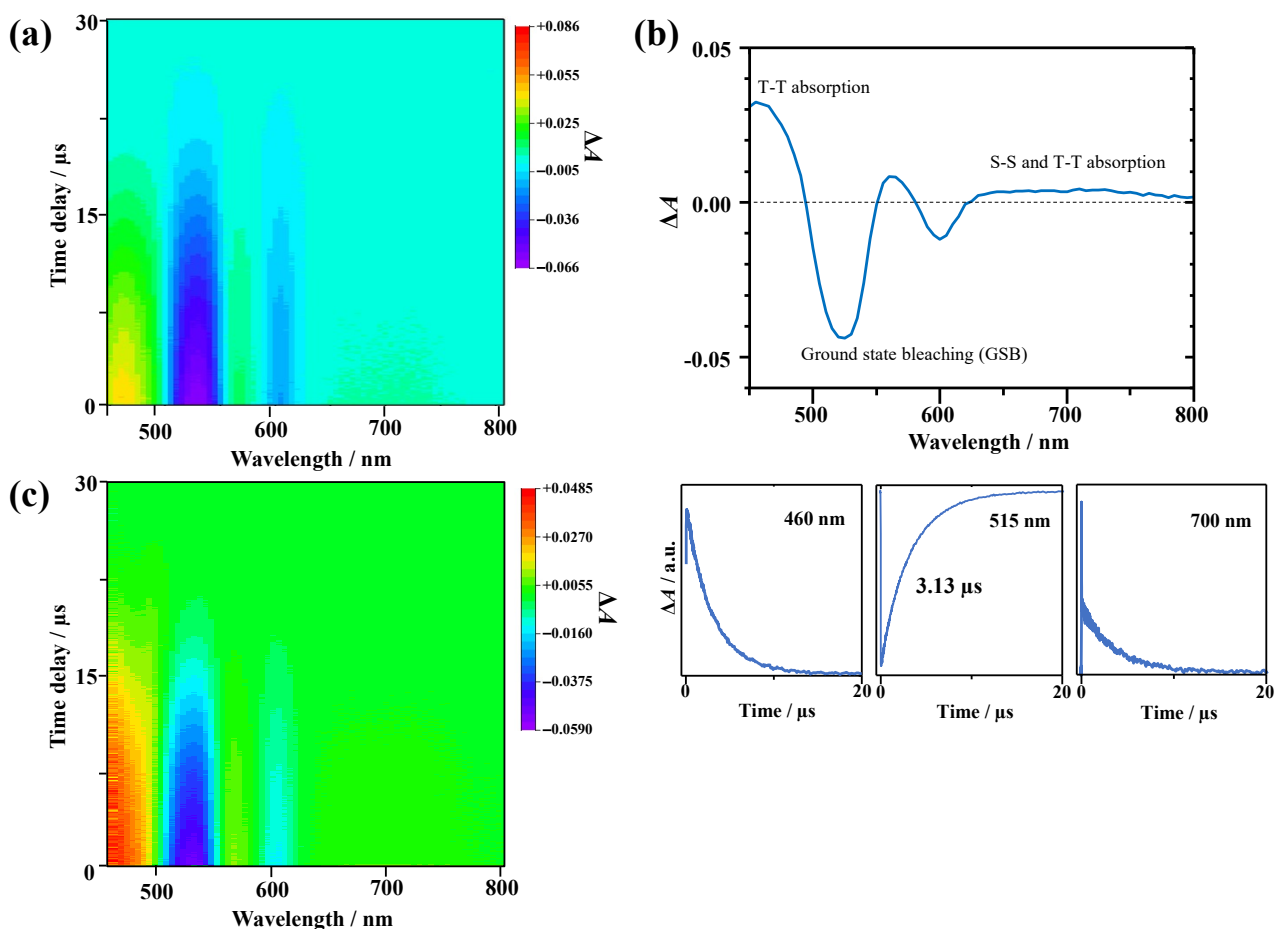

**Fig. S5** Transient absorption (TA) spectra which show  $\Delta A$  from 0 to 30  $\mu\text{s}$  time delays of  $\text{Au}_2\text{Cu}_6(\text{S-Adm})_6(\text{PPh}_3)_2$  (270  $\mu\text{M}$ ) in deaerated THF with excitation at 532 nm. b) Transient absorption spectrum at 1  $\mu\text{s}$  time delay and corresponding time profiles at 460, 515, and 700 nm. c) TA spectra obtained for  $\text{Au}_2\text{Cu}_6(\text{S-Adm})_6(\text{PPh}_3)_2$  (270  $\mu\text{M}$ ) with perylene (10 mM) in deaerated THF with excitation at 532 nm.

### Triplet energy transfer (TET) efficiency

The TET efficiency ( $\Phi_{\text{TET}}$ ) can be estimated by performing quenching measurements of the PL lifetimes of the sensitizer, as described by the Stern-Volmer relationship as follows:

$$\frac{\tau_0}{\tau} = 1 + K_{\text{SV}}[E] \quad (\text{S2})$$

where  $K_{\text{SV}}$  is the Stern–Volmer constant,  $[E]$  is the emitter concentration, and  $\tau_0$  and  $\tau$  correspond to the unquenched and quenched PL lifetimes of the sensitizer, respectively. In the present case,  $\tau_0$  corresponds to the phosphorescence lifetime ( $\tau_p$ ) of  $\text{Au}_2\text{Cu}_6(\text{S-Adm})_6(\text{PPh}_3)_2$ . The  $\Phi_{\text{TET}}$  was calculated by the following equation:

$$\Phi_{TET} = \frac{K_{SV}[E]}{1 + K_{SV}[E]} = \frac{k_{TET}\tau_0[E]}{1 + k_{TET}\tau_0[E]} \quad (S3)$$

The results are summarized in Table S1.

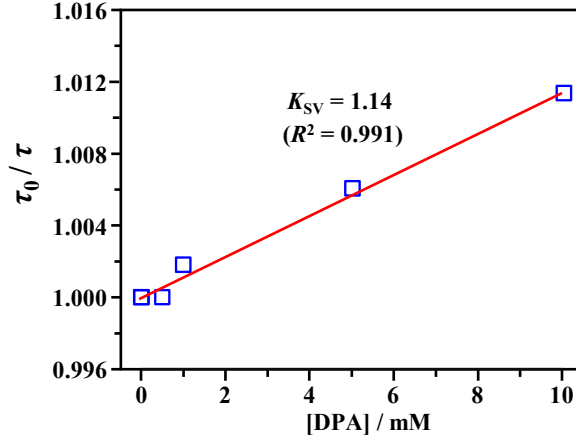

**Fig. S6.** Stern–Volmer plots of PL quenching of  $\text{Au}_2\text{Cu}_6(\text{S-Adm})_6(\text{PPh}_3)_2$  by DPA emitter ( $\lambda_{\text{ex}} = 532 \text{ nm}$ ).

**Table S1.** Estimated rate constants for triplet energy transfer (TET) from the  $\text{Au}_2\text{Cu}_6$  cluster sensitizers to emitters ( $\lambda_{\text{ex}} = 640 \text{ nm}$ ).

| Sensitizer                                               | Emitter    | $E_T / \text{eV}$ | $K_{SV} / \text{M}^{-1}$ | $k_{TET} / \text{M}^{-1}\text{s}^{-1}$ | $\Phi_{TET}$ |
|----------------------------------------------------------|------------|-------------------|--------------------------|----------------------------------------|--------------|
| $\text{Au}_2\text{Cu}_6(\text{S-Adm})_6(\text{PPh}_3)_2$ | perylene   | 1.53              | 93.9                     | $1.91 \times 10^7$                     | $0.32^a$     |
|                                                          | DPA        | 1.77              | 1.14                     | $2.32 \times 10^5$                     | $0.022^b$    |
|                                                          | anthracene | 1.84              | -                        | -                                      | -            |

<sup>a</sup> At 5 mM of perylene. <sup>b</sup> At 20 mM of DPA.

### Emitter quenching yield $\Phi_q$ and optical outcoupling yield $\Phi_{\text{out}}$

The details of how to evaluate  $\Phi_{\text{out}}$  and  $\Phi_q$  have already been reported in ref. 2, and will be briefly described here. In order to obtain the value of  $\Phi_q$ , the emitter triplet lifetime ( $\tau_T$ ) for each sensitizer concentration was determined by fitting the UC emission decay curve,  $I(t)$ , using the following equation:<sup>3</sup>

$$I(t) = I(0) \left( \frac{1 - \beta}{\exp(t/\tau_T) - \beta} \right)^2 \quad (S4)$$

where

$$\beta = \frac{2k_{TTA}[^3E^*]_0}{1/\tau_T + 2k_{TTA}[^3E^*]_0} \quad (0 < \beta < 1). \quad (S5)$$

Fig. S7a shows the TF-UC emission decay curves obtained at different cluster sensitizer concentrations and the extracted values of  $\tau_T$  and  $\beta$  are summarized in Table S2.

As shown in Fig. S7b, the values of  $\tau_T$  were plotted against  $[Au_2Cu_6]$  to generate Stern–Volmer plots described by the following relationship:

$$\frac{1}{\tau_T} = \frac{1}{\tau_{T0}} + k_q[Au_2Cu_6]. \quad (S6)$$

Additionally, the quenching efficiency ( $\Phi_q$ ) is calculated by

$$\Phi_q = \frac{k_q\tau_{T0}[Au_2Cu_6]}{1 + k_q\tau_{T0}[Au_2Cu_6]}. \quad (S7)$$

The results are summarized in Table S3.

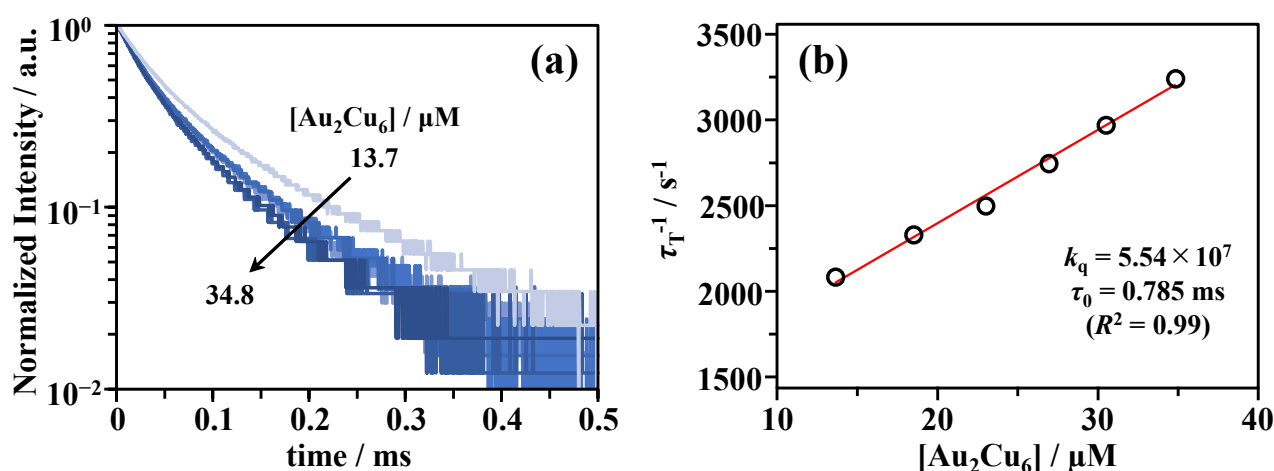

**Fig. S7** (a) Triplet fusion upconversion (TF-UC) emission decay curves of solutions containing different concentrations of  $Au_2Cu_6(S-Adm)_6(PPh_3)_2$  with 5.0 mM perylene excited at 532 nm with excitation intensity of  $7.9 \text{ Wcm}^{-2}$ .

**Table S2. Triplet lifetimes of perylene in deaerated THF containing different  $Au_2Cu_6$  sensitizer concentrations.**

| $[Au_2Cu_6] / \mu\text{M}$ | $\tau_T / \text{ms}$ | $\beta$ |
|----------------------------|----------------------|---------|
| 13.7                       | 0.48                 | 0.83    |
| 18.4                       | 0.43                 | 0.85    |
| 23.2                       | 0.40                 | 0.84    |
| 26.9                       | 0.37                 | 0.82    |
| 30.4                       | 0.34                 | 0.83    |
| 34.8                       | 0.31                 | 0.81    |

**Table S3. Emitter triplet lifetime in the absence of sensitizer ( $\tau_{T0}$ ) and quenching rate constant ( $k_q$ ) and quenching efficiency ( $\Phi_q$ ) of triplet emitter by sensitizer.**

| sensitizer               | emitter  | $\tau_{T0} / \mu\text{s}$ | $k_q / \text{M}^{-1}\text{s}^{-1}$ | $k_q[\text{Au}_2\text{Cu}_6] / \text{s}^{-1}^a$ | $\Phi_q^a$ |
|--------------------------|----------|---------------------------|------------------------------------|-------------------------------------------------|------------|
| $\text{Au}_2\text{Cu}_6$ | perylene | 785                       | $5.54 \times 10^7$                 | $6.86 \times 10^2$                              | 0.35       |

<sup>a</sup> $[\text{Au}_2\text{Cu}_6] = 12.4 \mu\text{M}$ .

For  $\Phi_{\text{out}}$ , it can be obtained from the following equation:

$$\Phi_{\text{out}} = \frac{\int F_0(\lambda) \cdot 10^{-\frac{A(\lambda)}{2}} d\lambda}{\int F_0(\lambda) d\lambda} \quad (\text{S8})$$

where  $F_0(\lambda)$  is the emission intensity at a wavelength  $\lambda$  in a dilute solution. The absorbance at a wavelength  $\lambda$  of the UC solution,  $A(\lambda)$ , was measured under an optical path length of 1.0 cm. In the PL measurement, the excitation light focused on the center of the  $1.0 \times 1.0$  cm cuvette, so the optical path length of the emitted UC photons is 0.5 cm, and the actual observed emission intensity can be expressed as  $F_0(\lambda) \cdot 10^{-A(\lambda)/2}$ .

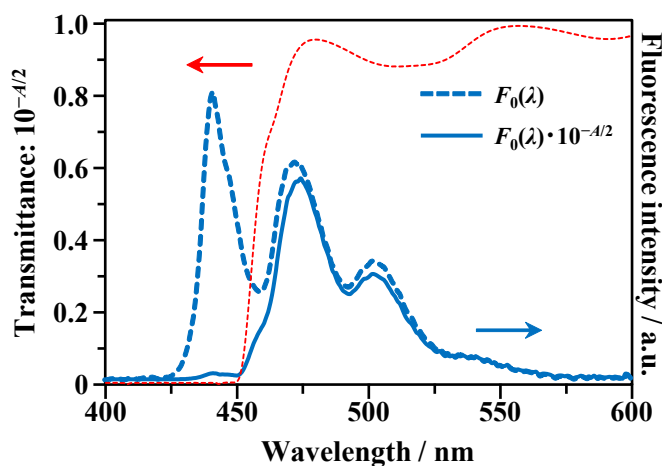

**Fig. S8.** Fluorescence spectrum (dashed line) of perylene (1  $\mu\text{M}$ ) in THF ( $\lambda_{\text{ex}} = 405$  nm) and transmittance curve (dotted line), given by  $10^{-A(\lambda)/2}$ , of a mixed solution containing 12.4  $\mu\text{M}$   $\text{Au}_2\text{Cu}_6$  and 5 mM perylene. The corrected fluorescence spectrum (solid line) obtained by multiplying the fluorescence spectrum of perylene in dilute solution by the transmittance curve is in good agreement with the measured UC spectrum (Fig. 4a).

## Temperature dependence of photoluminescence

The temperature dependence of the PL of the  $\text{Au}_2\text{Cu}_6(\text{S-Adm})_6(\text{PPh}_3)_2$  cluster in deaerated THF was measured using a variable temperature cell holder (CoolSpeK, Unisoku Co., Ltd.). The results obtained are shown in Table S4 and S5.

**Table S4. Temperature dependence of emission maximum wavelengths ( $\lambda_f$ ,  $\lambda_p$ ), lifetimes ( $\tau_f$ ,  $\tau_p$ ), and quantum yields ( $\Phi_f$ ,  $\Phi_p$ ) of fluorescence and phosphorescence, together with corresponding PL, ISC, and IC quantum yields of  $\text{Au}_2\text{Cu}_6(\text{S-Adm})_6(\text{PPh}_3)_2$  clusters in deaerated THF.**

| $T / \text{K}$ | $\lambda_f / \text{nm}$ | $\tau_f / \text{ns}$ | $\lambda_p / \text{nm}$ | $\tau_p / \mu\text{s}$ | $\Phi_f^a$ | $\Phi_{\text{PL}}$ | $\Phi_p^a$ | $\Phi_{\text{ISC}}$ | $\Phi_{\text{IC}}$ | $\Phi_{\text{ISC}}',^b$ |
|----------------|-------------------------|----------------------|-------------------------|------------------------|------------|--------------------|------------|---------------------|--------------------|-------------------------|
| 293            | 677                     | 9.0                  | 802                     | 4.91                   | 0.0051     | 0.21               | 0.44       | 0.47                | 0.52               | 0.56                    |
| 273            | 680                     | 13                   | 805                     | 5.35                   | 0.0074     | 0.18               | 0.51       | 0.35                | 0.64               | 0.49                    |
| 253            | 679                     | 23                   | 807                     | 5.66                   | 0.013      | 0.17               | 0.54       | 0.30                | 0.68               | 0.46                    |
| 233            | 677                     | 86                   | 811                     | 6.19                   | 0.049      | 0.12               | 0.59       | 0.20                | 0.75               | 0.41                    |
| 213            | 675                     | 124                  | 813                     | 6.79                   | 0.071      | 0.077              | 0.65       | 0.12                | 0.81               | 0.35                    |
| 193            | 675                     | 352                  | 814                     | 7.69                   | 0.20       | 0.062              | 0.74       | 0.084               | 0.71               | 0.26                    |
| 173            | 677                     | 1540                 | 814                     | 8.83                   | 0.88       | 0.059              | 0.85       | 0.069               | 0.051              | 0.15                    |

<sup>a</sup> Fluorescence and phosphorescence quantum yields at 173–273 K were estimated using  $k_f\tau_f$  and  $k_p\tau_p$ , respectively. The radiative rate constants were assumed to be temperature-independent, and  $k_f = 5.7 \times 10^5$  and  $k_p = 9.0 \times 10^4 \text{ s}^{-1}$  obtained at 293K were used. <sup>b</sup> Quantum yield and rate constant of ISC from  $T_1$  to  $S_0$ .

**Table S5. Temperature dependence of singlet and triplet radiative rate constants ( $k_f$  and  $k_p$ ), rate constants of  $S_1$ - $T_1$  and  $T_1$ - $S_0$  intersystem crossing ( $k_{\text{ISC}}$  and  $k_{\text{ISC}}'$ ) and internal conversion of  $\text{Au}_2\text{Cu}_6(\text{S-Adm})_6(\text{PPh}_3)_2$  clusters in deaerated THF.**

| $T / \text{K}$ | $k_f / \text{s}^{-1}$ | $k_{\text{ISC}} / \text{s}^{-1}$ | $k_{\text{IC}} / \text{s}^{-1}$ | $k_p / \text{s}^{-1}$ | $k_{\text{ISC}}' / \text{s}^{-1}$ |
|----------------|-----------------------|----------------------------------|---------------------------------|-----------------------|-----------------------------------|
| 293            |                       | $5.3 \times 10^7$                | $5.8 \times 10^7$               |                       | $1.1 \times 10^5$                 |
| 273            |                       | $2.7 \times 10^7$                | $4.9 \times 10^7$               |                       | $9.2 \times 10^4$                 |
| 253            |                       | $1.3 \times 10^7$                | $3.0 \times 10^7$               |                       | $8.1 \times 10^4$                 |
| 233            | $5.7 \times 10^5$     | $2.3 \times 10^6$                | $8.8 \times 10^6$               | $9.0 \times 10^4$     | $6.6 \times 10^4$                 |
| 213            |                       | $9.5 \times 10^5$                | $6.5 \times 10^6$               |                       | $5.2 \times 10^4$                 |
| 193            |                       | $2.4 \times 10^5$                | $2.0 \times 10^6$               |                       | $3.4 \times 10^4$                 |
| 173            |                       | $4.5 \times 10^4$                | $3.3 \times 10^4$               |                       | $1.7 \times 10^4$                 |

**Table S6.**  $S_0$ -to- $S_n$  ( $n = 1-5$ ) and  $S_0$ -to- $T_n$  ( $n = 1-3$ ) vertical transition wavelengths (energies), oscillator strengths ( $f$ ), configuration interactions (CI), and expansion coefficients ( $P$ ) of  $Au_2Cu_6$  obtained by theoretical calculations.

| Excited state | wavelength / nm (eV) <sup>a</sup> | $f$ <sup>b</sup> | Dominant configuration | CI expansion coefficient <sup>c</sup> |
|---------------|-----------------------------------|------------------|------------------------|---------------------------------------|
| $T_1$         | 572.82 (2.1645)                   | 0.0000           | $H \rightarrow L$      | 0.61526 (97%)                         |
| $T_2$         | 572.21 (2.1667)                   | 0.0000           | $H \rightarrow L+1$    | 0.69822 (97%)                         |
| $S_1$         | 496.63 (2.4965)                   | 0.1427           | $H \rightarrow L$      | 0.68162 (92%)                         |
| $S_2$         | 496.20 (2.4987)                   | 0.1423           | $H \rightarrow L+1$    | 0.68162 (92%)                         |
| $T_3$         | 449.66 (2.7573)                   | 0.0000           | $H-1 \rightarrow L$    | 0.68915 (94%)                         |
| $S_3$         | 430.63 (2.8791)                   | 0.0721           | $H \rightarrow L+2$    | 0.70035 (98%)                         |
| $S_4$         | 428.41 (2.8940)                   | 0.0034           | $H-1 \rightarrow L$    | 0.68266 (93%)                         |
| $S_5$         | 428.02 (2.8967)                   | 0.0033           | $H-1 \rightarrow L+1$  | 0.68265 (93%)                         |

<sup>a</sup>The values in brackets are in eV. <sup>b</sup>Note that  $S_0$ -to- $T_n$  transitions have zero oscillator strengths because transitions to excited triplet states are spin forbidden under the present calculations including no spin-orbit coupling effect. <sup>c</sup>The values in brackets are the percentage contribution ( $P = 2|CI|^2$ ).

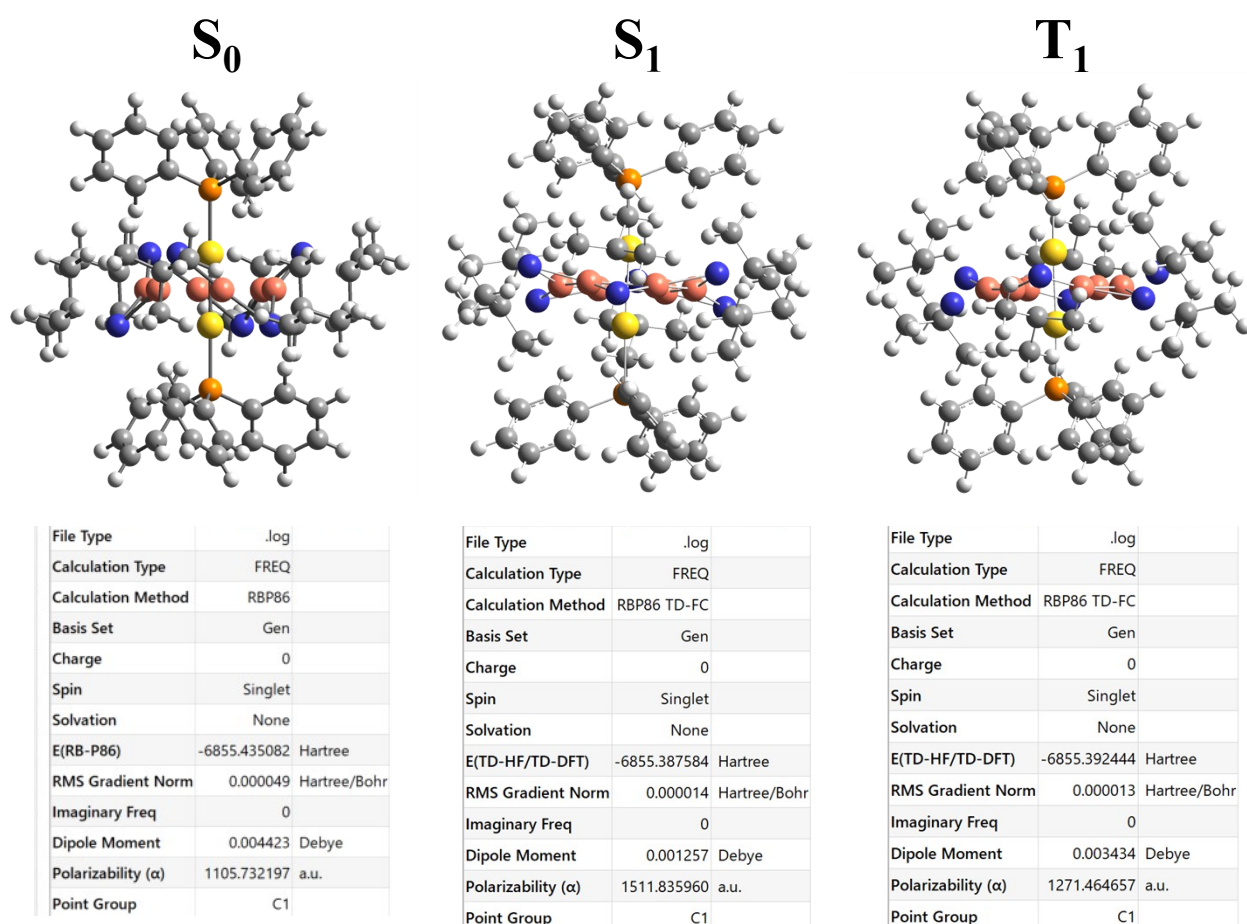

**Fig. S9** Optimized structures of  $Au_2Cu_6(S-CMe_3)_6(PPh_3)_2$  in the  $S_0$ ,  $S_1$ , and  $T_1$  states (upper panel), together with their Gaussian calculation summary provided using GaussView 6.0 (lower panel).

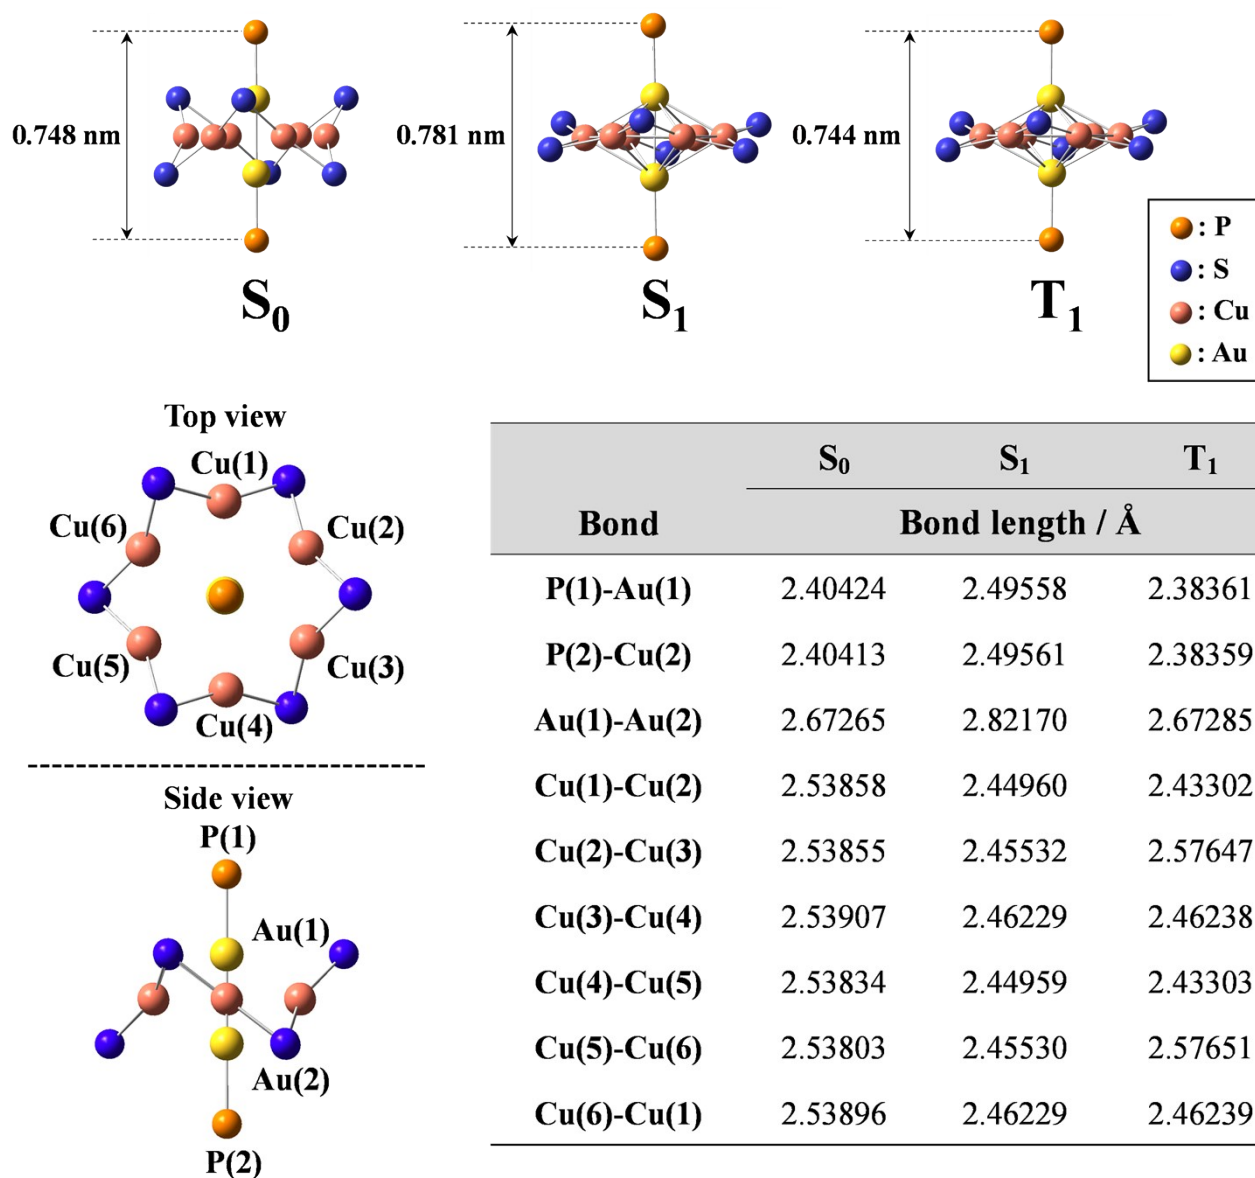

**Fig. S10.** Optimized structures of  $\text{Au}_2\text{Cu}_6(\text{S-CMe}_3)_6(\text{PPh}_3)_2$  in the  $S_0$ ,  $S_1$ , and  $T_1$  states (upper panel). For clarity, only the  $\text{Au}_2\text{Cu}_6$  moiety with two P atoms is shown and the ligand parts are excluded; the full structures are given in Fig. S9. The Au-Au bond remains almost unchanged between the  $S_0$  and  $T_1$  states, but is significantly elongated in the  $S_1$  state. The crown structure of the  $\text{Cu}_6\text{S}_6$  site, which is highly zigzagged in the  $S_0$  state, approaches a much more planar structure in the  $S_1$  and  $T_1$  states. The bond lengths in the  $S_0$ ,  $S_1$ , and  $T_1$  states (bottom panel). The ring structure consisting of six copper atoms is  $D_{6h}$ -like regular hexagonal in the  $S_0$  state, but in the  $S_1$  state and especially in the  $T_1$  state, the symmetry is reduced to a distorted hexagon.

## References

- (1) S. Prathapan, S. I. Yang, J. Seth, M. A. Miller, D. F. Bocian, D. Holten, J. S. Lindsey, *J. Phys. Chem., B* 2001, **105**, 8237.
- (2) Y. Niihori, Y. Wada, M. Mitsui, *Angew. Chem. Int. Ed.*, 2021, **60**, 2822.
- (3) E. M. Gholizadeh, L. Frazer, R. W. MacQueen, J. K. Gallahera, T. W. Schmidt, *Phys. Chem. Chem. Phys.*, 2018, **20**, 19500.
